# Supplementary material for: Sulfur quantum dot-based “ON–OFF–ON” fluorescence platform for detection and bioimaging of Cr(vi) and ascorbic acid in complex environmental matrices and biological tissues
Source: PubMed Central journal article supplement (PMC8695692; doi:10.1039/d1ra00401h), 2021-03-11
Supplement: RA-011-D1RA00401H-s001.pdf [file RA-011-D1RA00401H-s001.pdf]

Sulfur quantum dot-based "ON-OFF-ON" fluorescence platform for detection and bioimaging of Cr(VI) and ascorbic acid in complex environmental matrices and biological tissues

Mengke Xia<sup>1</sup>, He Mei<sup>2</sup>, Qihui Qian<sup>1</sup>, Randy A. Dahlgren<sup>2</sup>, Ming Gao<sup>1\*</sup>, Xuedong Wang<sup>1#</sup>

<sup>1</sup> School of Environmental Science and Engineering, Suzhou University of Science and Technology, Suzhou 215009, China

<sup>2</sup> College of Public Health and Management, Wenzhou Medical University, Wenzhou 325035, China

#Corresponding author: Xuedong Wang, Email:zjuwxd@163.com, Phone: +86-5126809 5950.

Fax: +86-512-6809 5950

\*Co-corresponding author: Ming Gao, Email:gaoming@usts.edu.cn

Submitted to *RSC Advances*

March 05, 2021

**Table S1.** Comparison of SQDs-based “ON-OFF” method with previously reported methods for Cr(VI) detection

| Methods                            | Linear range<br>( $\mu\text{M}$ ) | Detection limit<br>( $\mu\text{M}$ ) | Ref.      |
|------------------------------------|-----------------------------------|--------------------------------------|-----------|
| CD fluorescence sensor             | 2-180                             | 2.10                                 | 1         |
| Dual emissive carbon dots          | 2-300                             | 0.40                                 | 2         |
| Cobalt(II)-doped carbon dots       | 5-125                             | 1.17                                 | 3         |
| GQD-modified membranes             | 1-500                             | 0.19                                 | 4         |
| Au-Ag-Pt three material electrodes | 2-200                             | 0.90                                 | 5         |
| SQD-based “ON-OFF”                 | 5-1500                            | 1.50                                 | This work |

**Table S2.** Comparison of SQDs-based “ON-OFF” method with previously reported methods for AA detection

| Methods                                             | Linear range<br>( $\mu\text{M}$ ) | Detection limit<br>( $\mu\text{M}$ ) | Ref.      |
|-----------------------------------------------------|-----------------------------------|--------------------------------------|-----------|
| CdTe quantum dots                                   | 10-250                            | 1.30                                 | 6         |
| AuNCs-PbS quantum dots                              | 3.0-40                            | 1.50                                 | 7         |
| P, N-CDs quantum dots                               | 5.0-200                           | 1.35                                 | 8         |
| N, S co-doped carbon quantum dots/ $\text{Fe}^{3+}$ | 10-200                            | 4.96                                 | 9         |
| $\text{LaF}_3\text{:Ce}$ , Tb nanoparticles         | 8-100                             | 2.40                                 | 10        |
| Carbon dot nanosensor                               | 30-100                            | 1.20                                 | 11        |
| SQD/Cr(VI)-based “ON-OFF-ON”                        | 10-5500                           | 3.00                                 | This work |

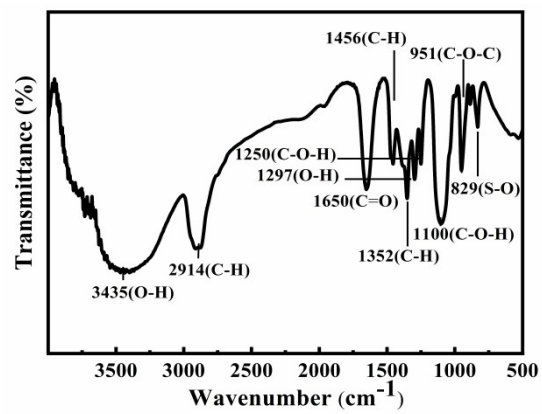

**Fig. S1.** FT-IR of SQDs

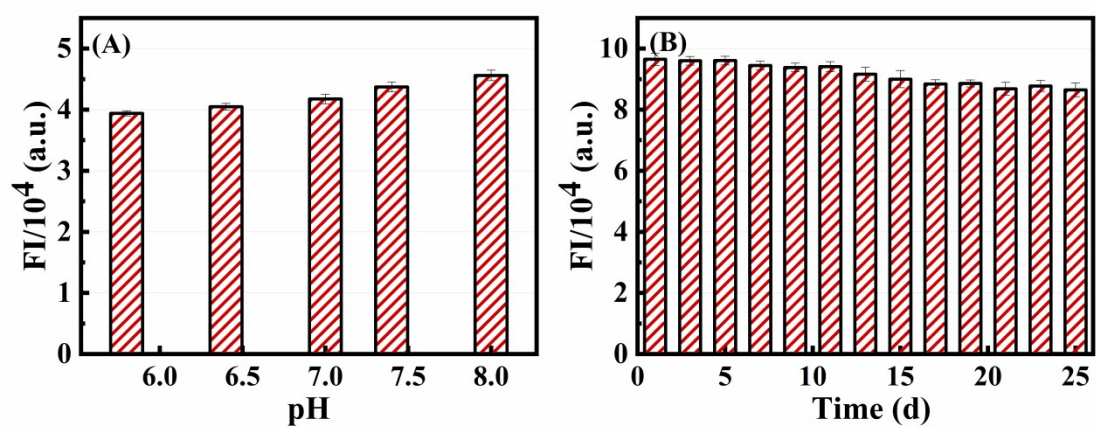

**Fig. S2.** (A) Effects of pH on the FIs of SQDs. (B) FI stability of SQDs tested

**Note:** (1) FI indicates abbreviation for fluorescence intensity. (2) All values were reported as mean  $\pm$ std (n = 3).

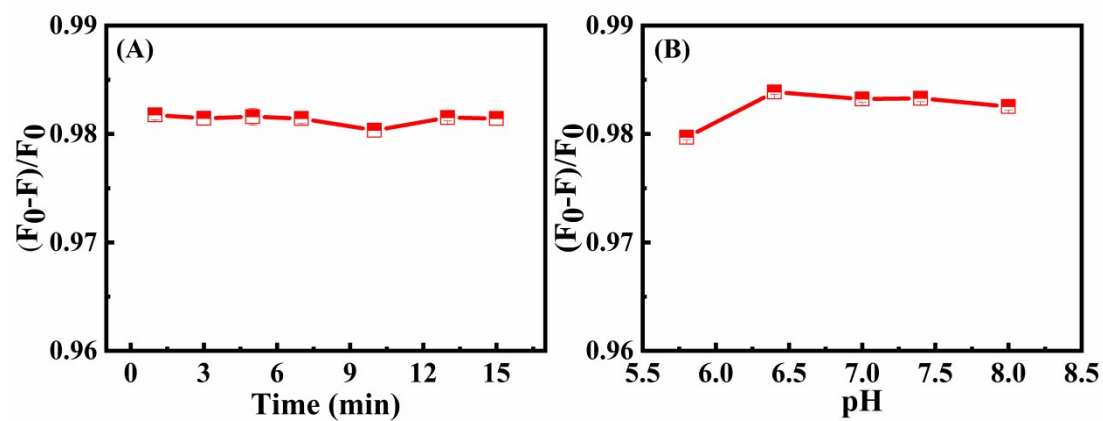

**Fig. S3.** (A) Effects of reaction time on the FIs of the SQDs/Cr(VI) system. (B) Effects of pH on the FIs of SQDs and SQDs/Cr(VI) systems

**Note:** (1) Cr(VI) concentration was 25 mM in the SQDs/Cr(VI) system. (2) All values were reported as mean  $\pm$ std (n = 4).

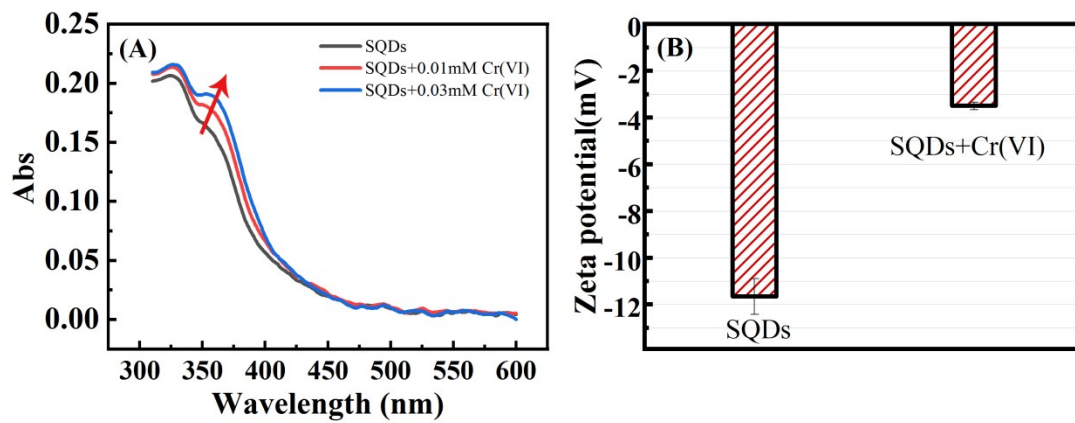

**Fig. S4.** (A) UV-Vis spectrum of SQDs in the presence of different concentrations Cr(VI); (B)

Zeta potential of SQDs and SQDs/Cr(VI) **Note:** Cr(VI) concentrations was 25 mM

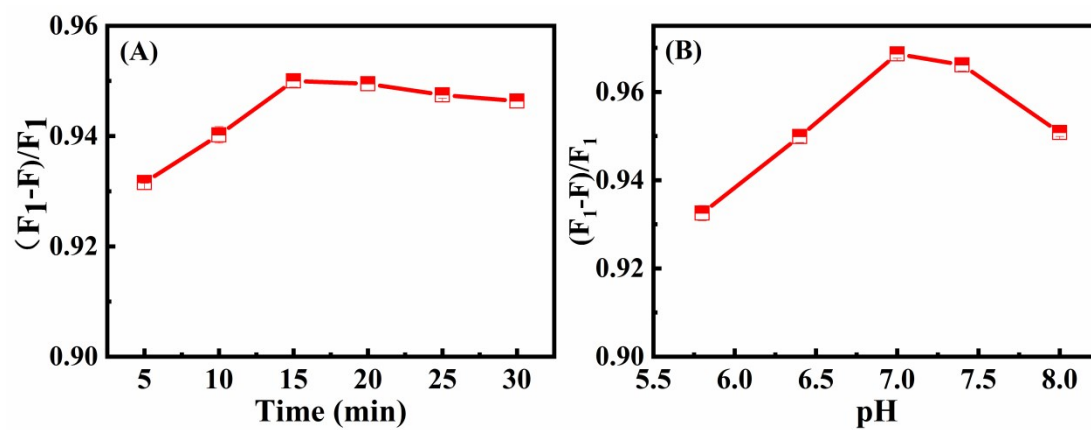

**Fig. S5.** (A) Effects of reaction time on the FIs of the SQDs/Cr(VI)/AA system. (B) Effects of pH on the FIs of the SQDs and SQDs/Cr(VI)/AA systems

**Note:** (1) Cr(VI) and AA concentrations were 25 and 50 mM, respectively. (2) All values were reported as mean  $\pm$ std (n = 4).



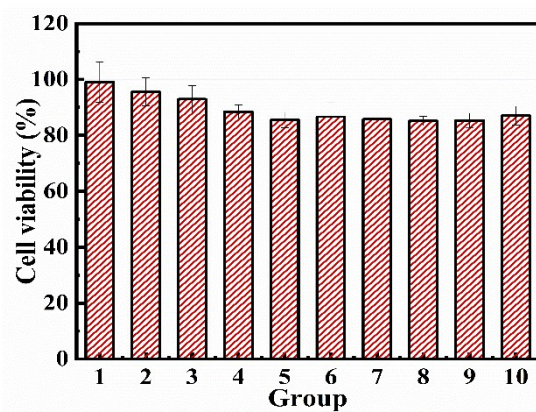

**Fig. S6.** Effects of the SQDs amount on HeLa cell viability

**Notes:** (1) Incubation time of HeLa cells was 24 h after dialysis with fortified volumes of 0, 5, 10, 20, 24, 28, 32, 36, 40 and 50  $\mu\text{L}$  for groups 1-10, respectively, in a total constant volume of 200  $\mu\text{L}$ . (2) All values were reported as mean  $\pm$ std (n = 8).

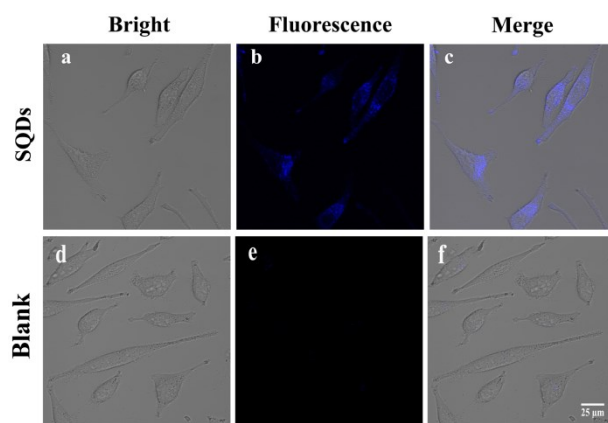

**Fig. S7.** Fluorescence imaging of HeLa cell with (a-c) and without SQDs (d-f)

## References

1. C. Li, W. Liu, X. Sun, W. Pan and J. Wang, *Sens. Actuators B: Chem.*, 2017, 252, 544-553.
2. Y. Ma, Y. Chen, J. Liu, Y. Han, S. Ma and X. Chen, *Talanta*, 2018, 185, 249-257.
3. H. Y. Zhang, Y. Wang, S. Xiao, H. Wang, J. H. Wang and L. Feng, *Biosens. Bioelectron.*, 2017, 87, 46-52.
4. P. M. Carrasco, I. García, L. Yate, R. Tena Zaera, G. Cabañero, H. J. Grande and V. Ruiz, *Carbon*, 2016, 109, 658-665.
5. D. Li, J. Li, X. Jia, Y. Xia, X. Zhang and E. Wang, *Anal. Chim. Acta*, 2013, 804, 98-103.
6. J. Zhu, Z.-J. Zhao, J.-J. Li and J.-W. Zhao, *J. Lumin.*, 2017, 192, 47-55.
7. P. Zhao, K. He, Y. Han, Z. Zhang, M. Yu, H. Wang, Y. Huang, Z. Nie and S. Yao, *Anal. Chem.*, 2015, 87, 9998-10005.
8. X. Gong, Y. Liu, Z. Yang, S. Shuang, Z. Zhang and C. Dong, *Anal Chim Acta*, 2017, 968, 85-96.
9. X. Luo, W. Zhang, Y. Han, X. Chen, L. Zhu, W. Tang, J. Wang, T. Yue and Z. Li, *Food Chem.*, 2018, 258, 214-221.
10. C. Mi, T. Wang, P. Zeng, S. Zhao, N. Wang and S. Xu, *Anal. Methods*, 2013, 5, 1463.
11. M. Zheng, Z. Xie, D. Qu, D. Li, P. Du, X. Jing and Z. Sun, *ACS Appl. Mater. Interfaces*, 2013, 5, 13242-13247.
